# Supplementary material for: Upcycling Glass Waste into Porous Microspheres for Wastewater Treatment Applications: Efficacy of Dye Removal
Source: MDPI journal article supplement (doi:10.3390/ma15175809), 2022-08-23
Supplement: s1 [file s1]

## Supplementary Section

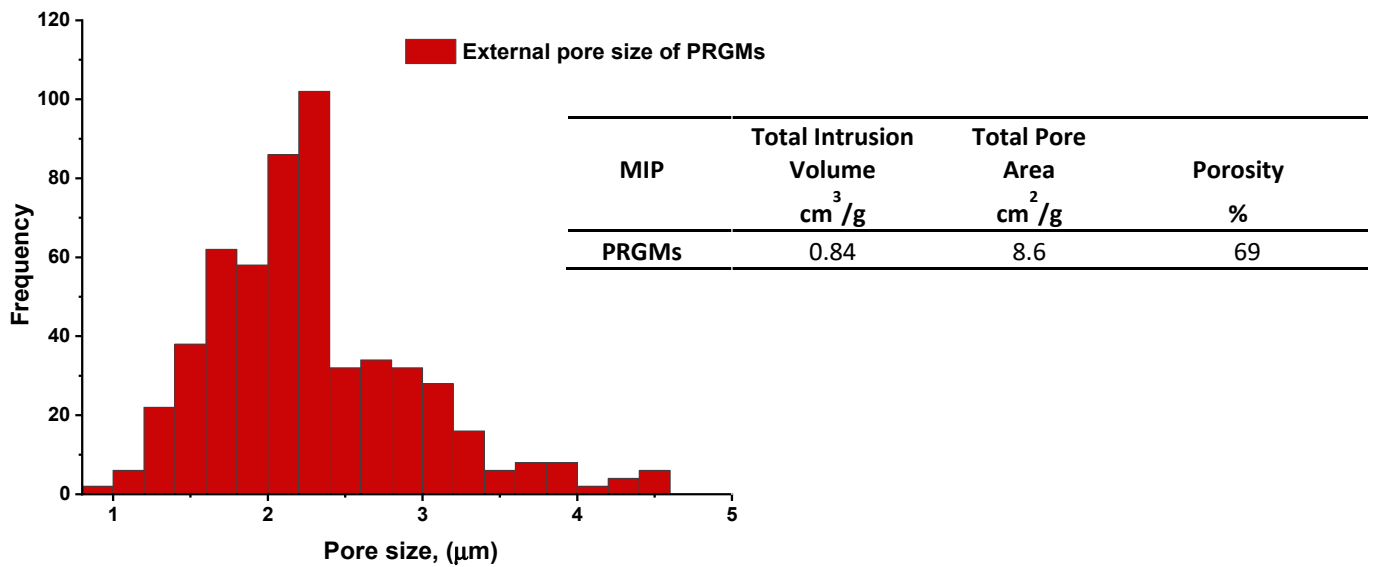

*Figure S1: Surface pore determination using SEM assisted Image J analysis with inset showing mercury porosimetry analysis of internal pores of PRGMs.*

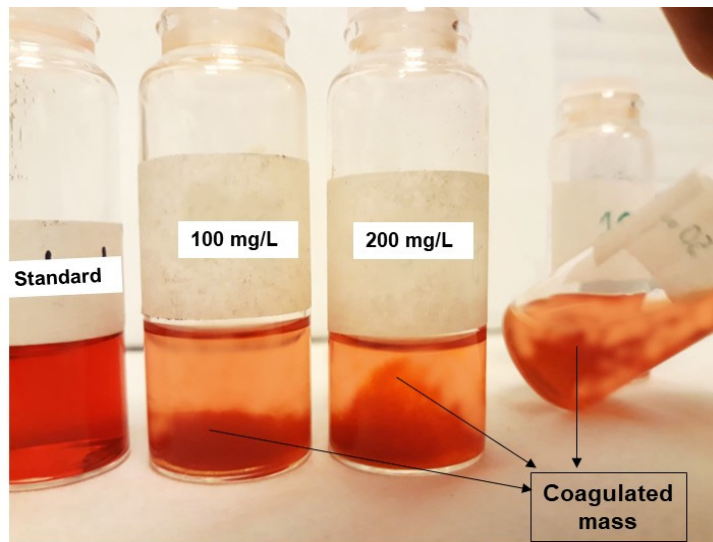

*Figure S2: Effect of dye concentration on adsorption into W-PRGMs for AR88 (PRGMs dose= 10 g/L with pH 2.5 and temperature of  $22 \pm 2$  °C)*

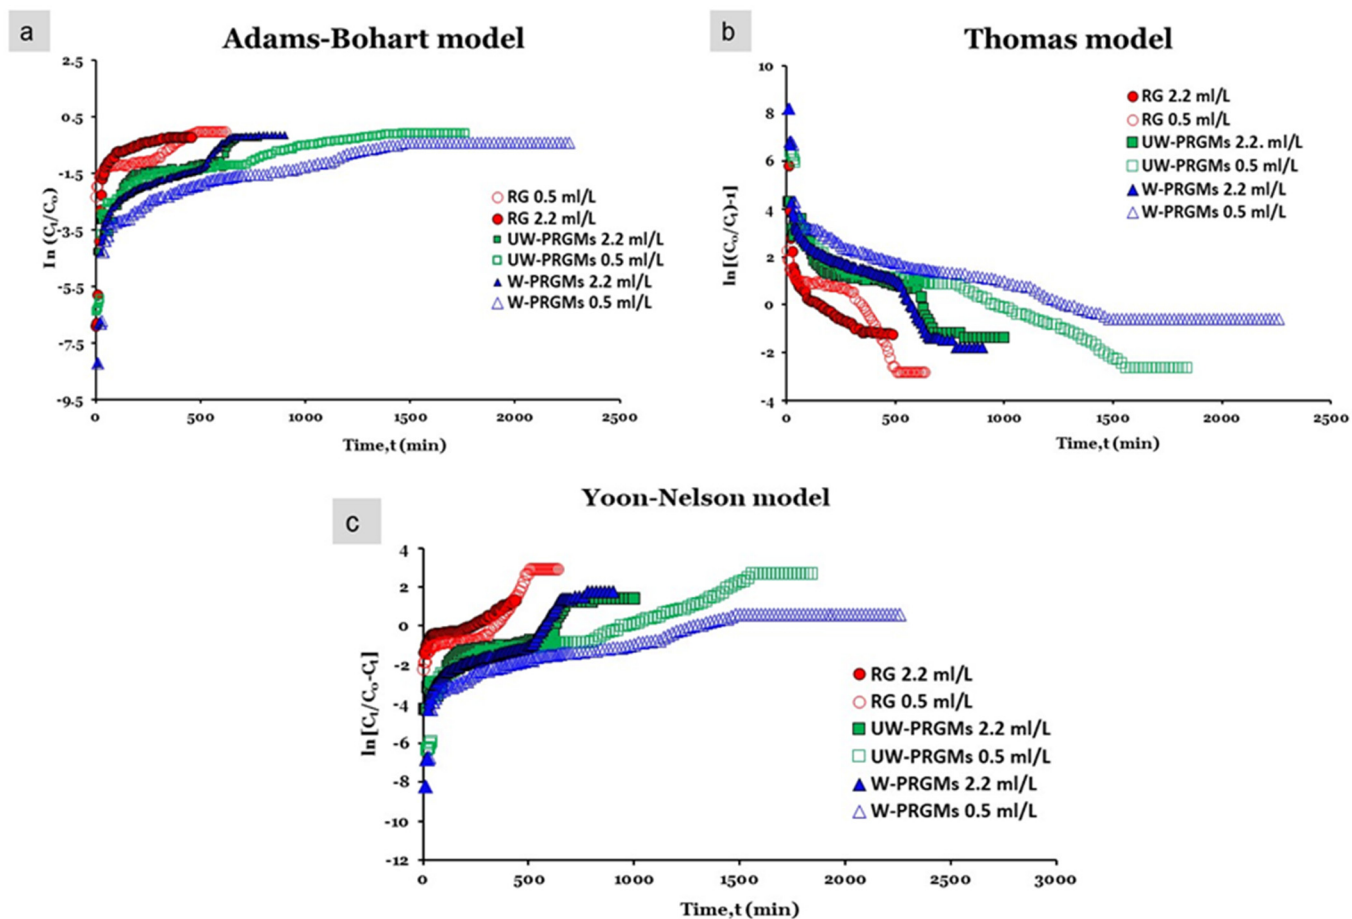

Figure S3: a) Adams-Bohart model, b) Thomas model, and c) Yoon-Nelson model at different flowrates ( $C_0 = 100 \text{ mg/L}$ ).

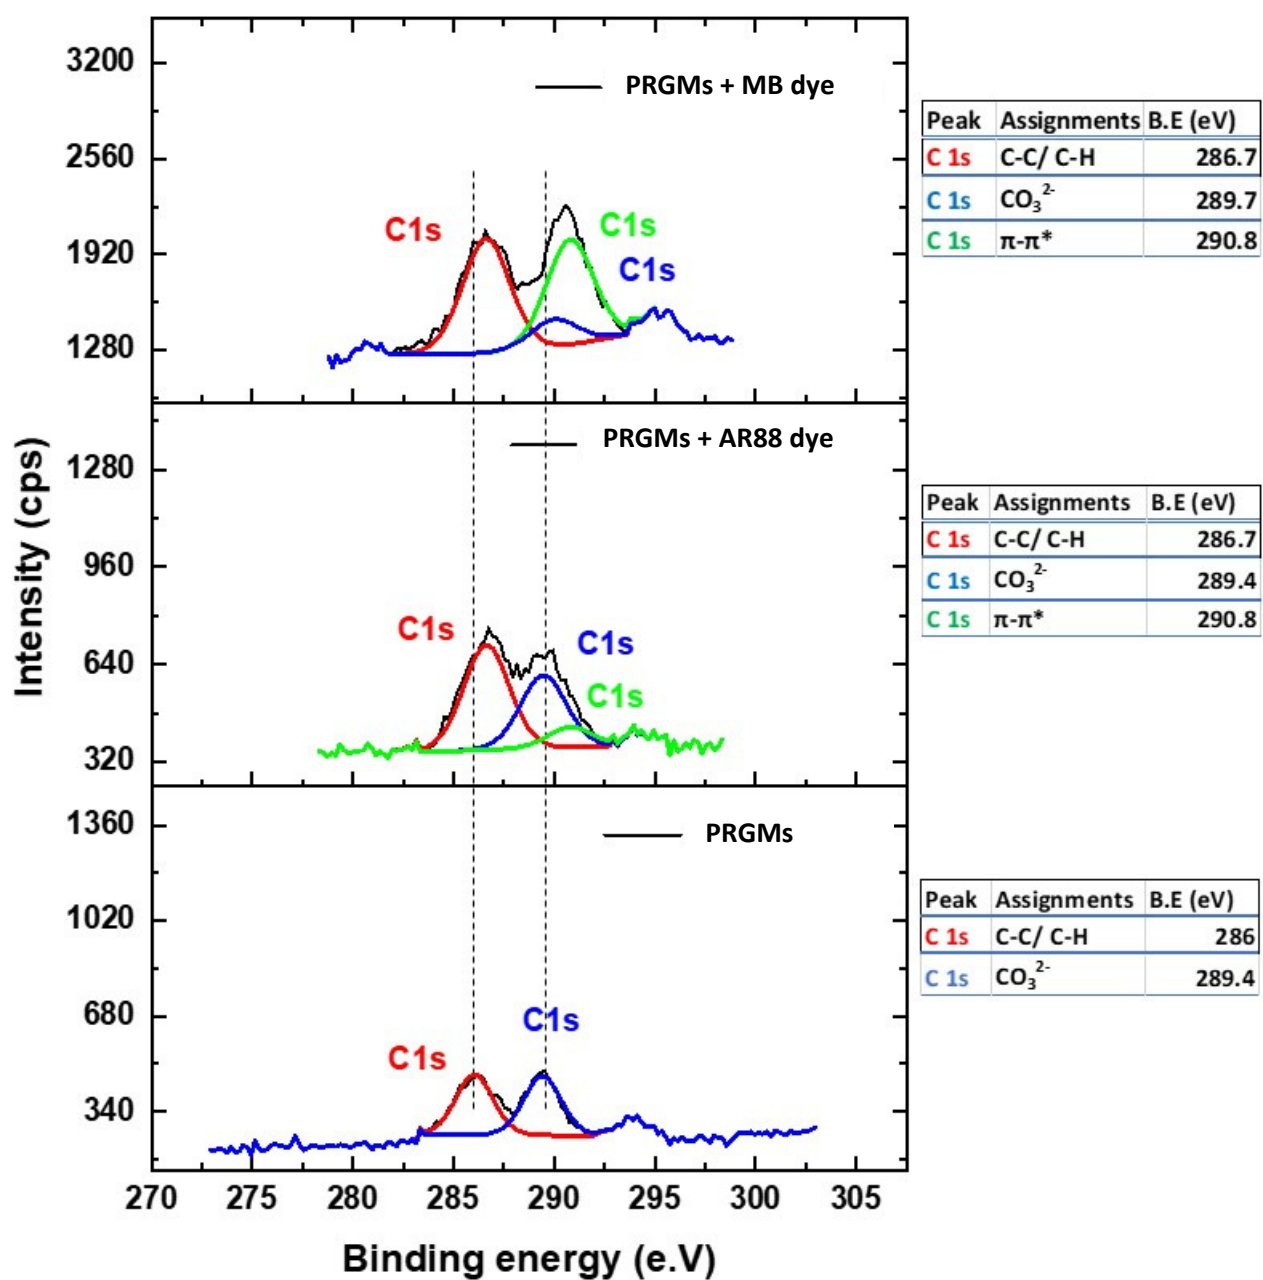

Figure S4: High resolution XPS spectra of C 1s for PRGMs before and after AR88 and MB adsorption.

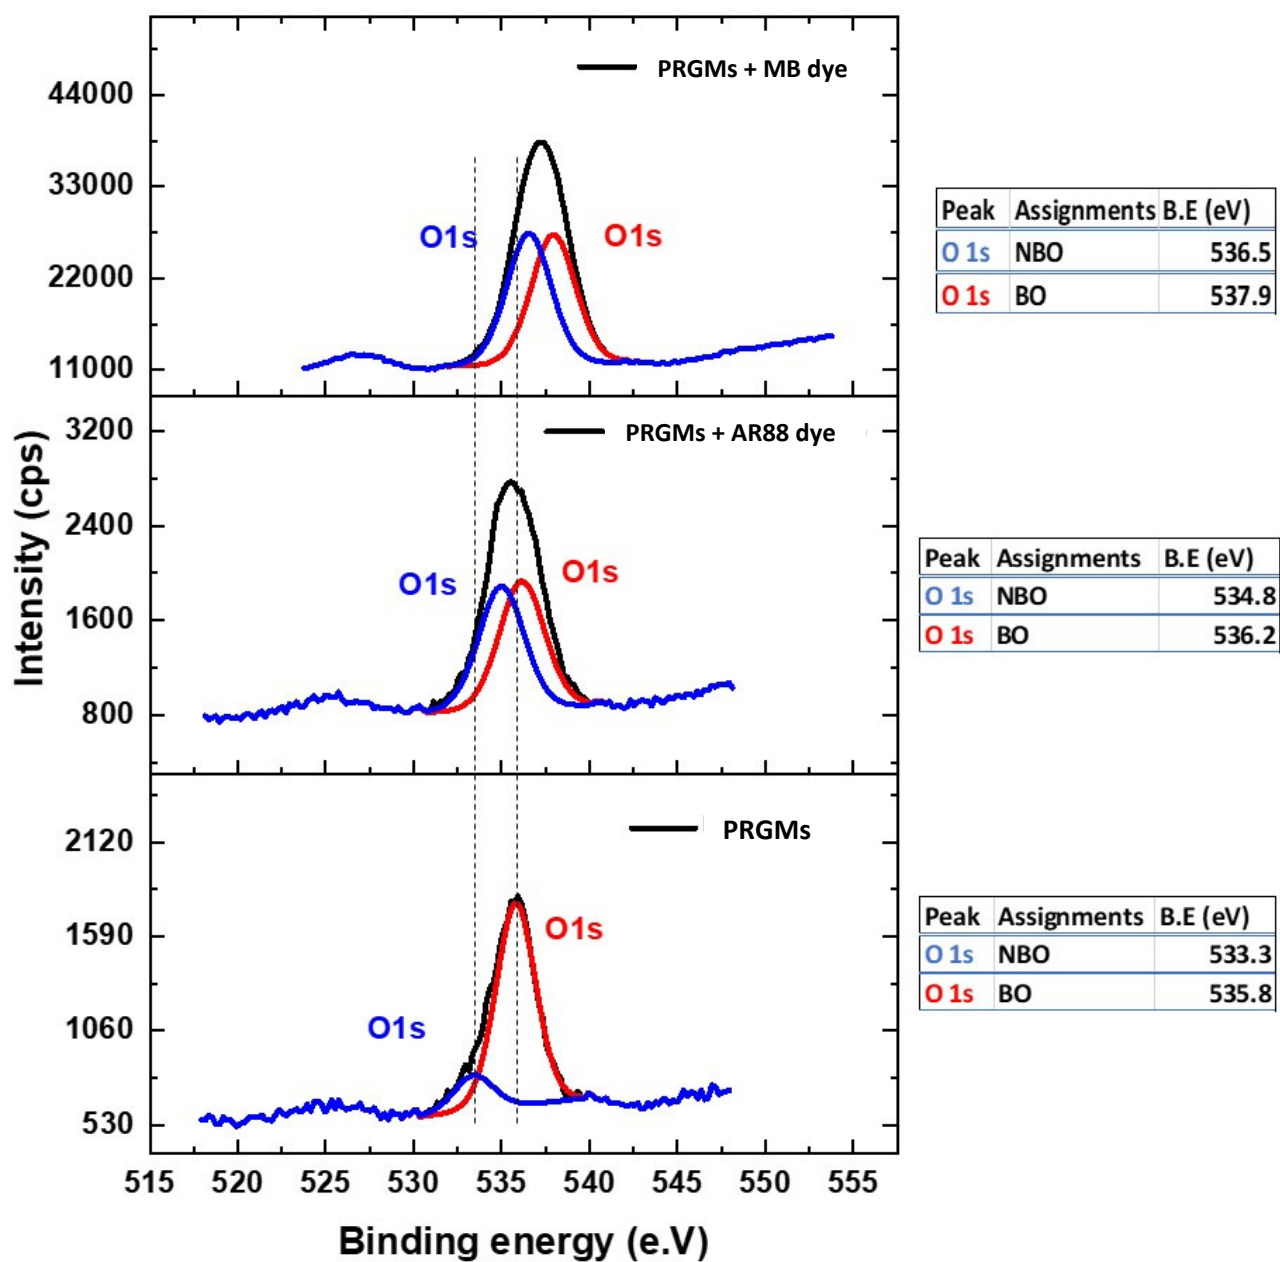

Figure S5: High resolution XPS spectra of O 1s for PRGMs before and after AR88 and MB adsorption.

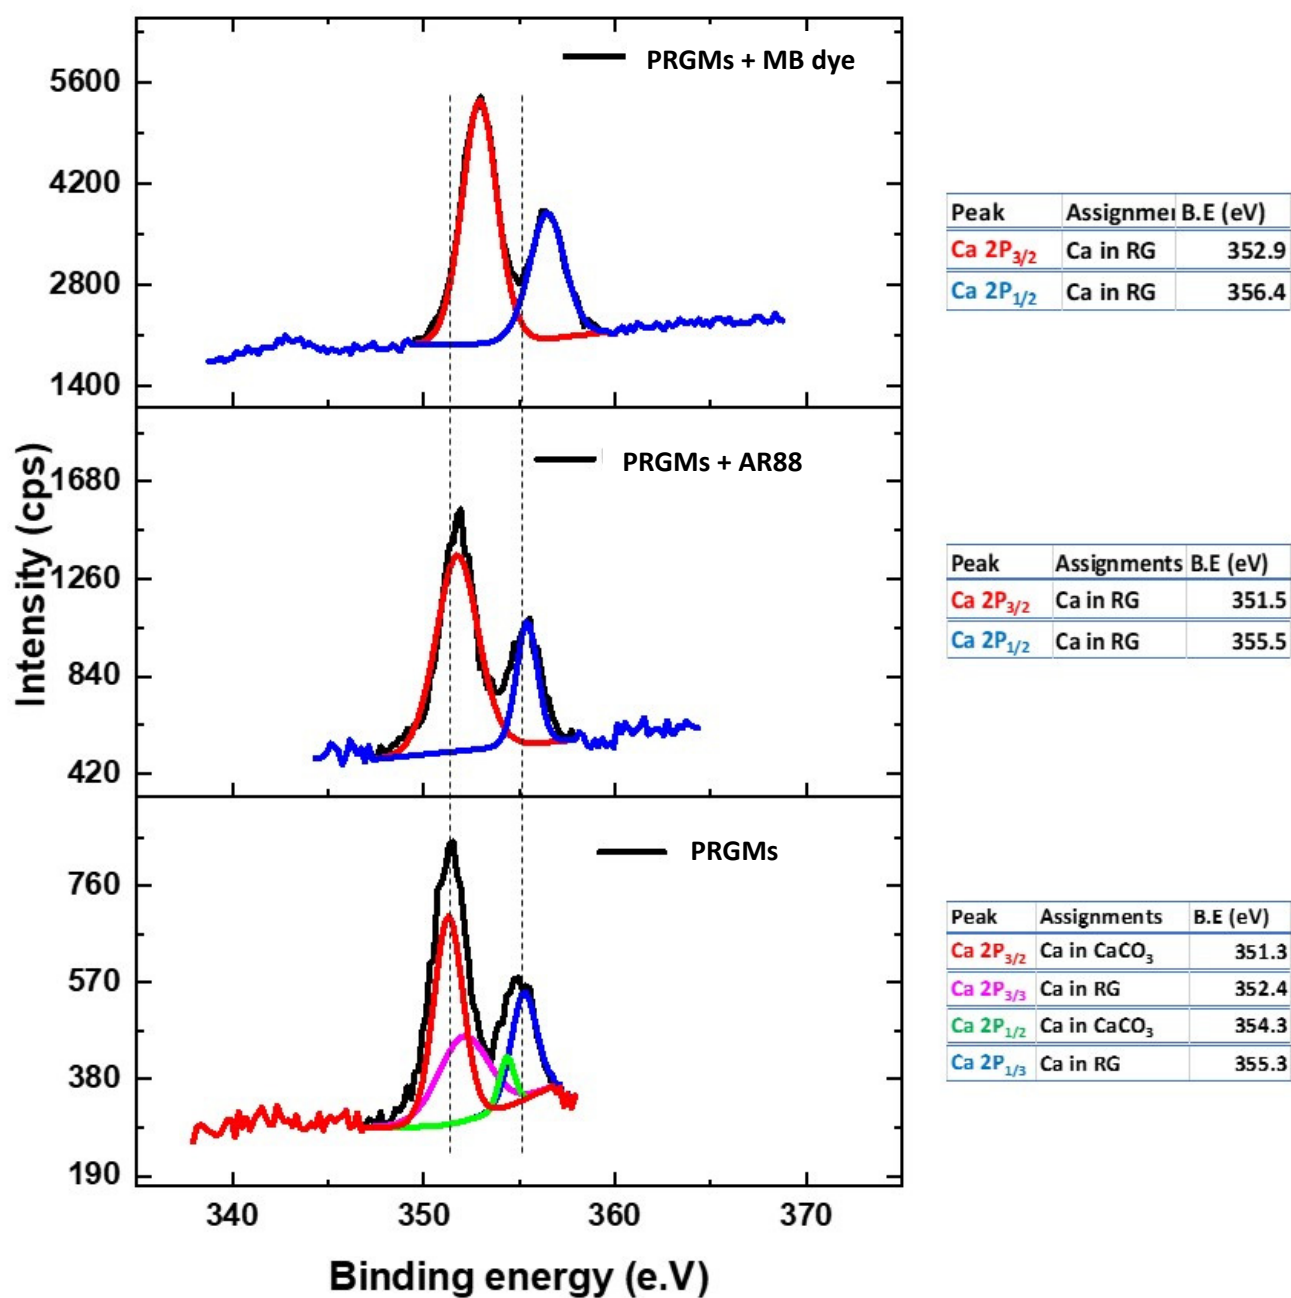

Figure S6: High resolution XPS spectra of Ca 2p for PRGMs before and after AR88 and MB adsorption.

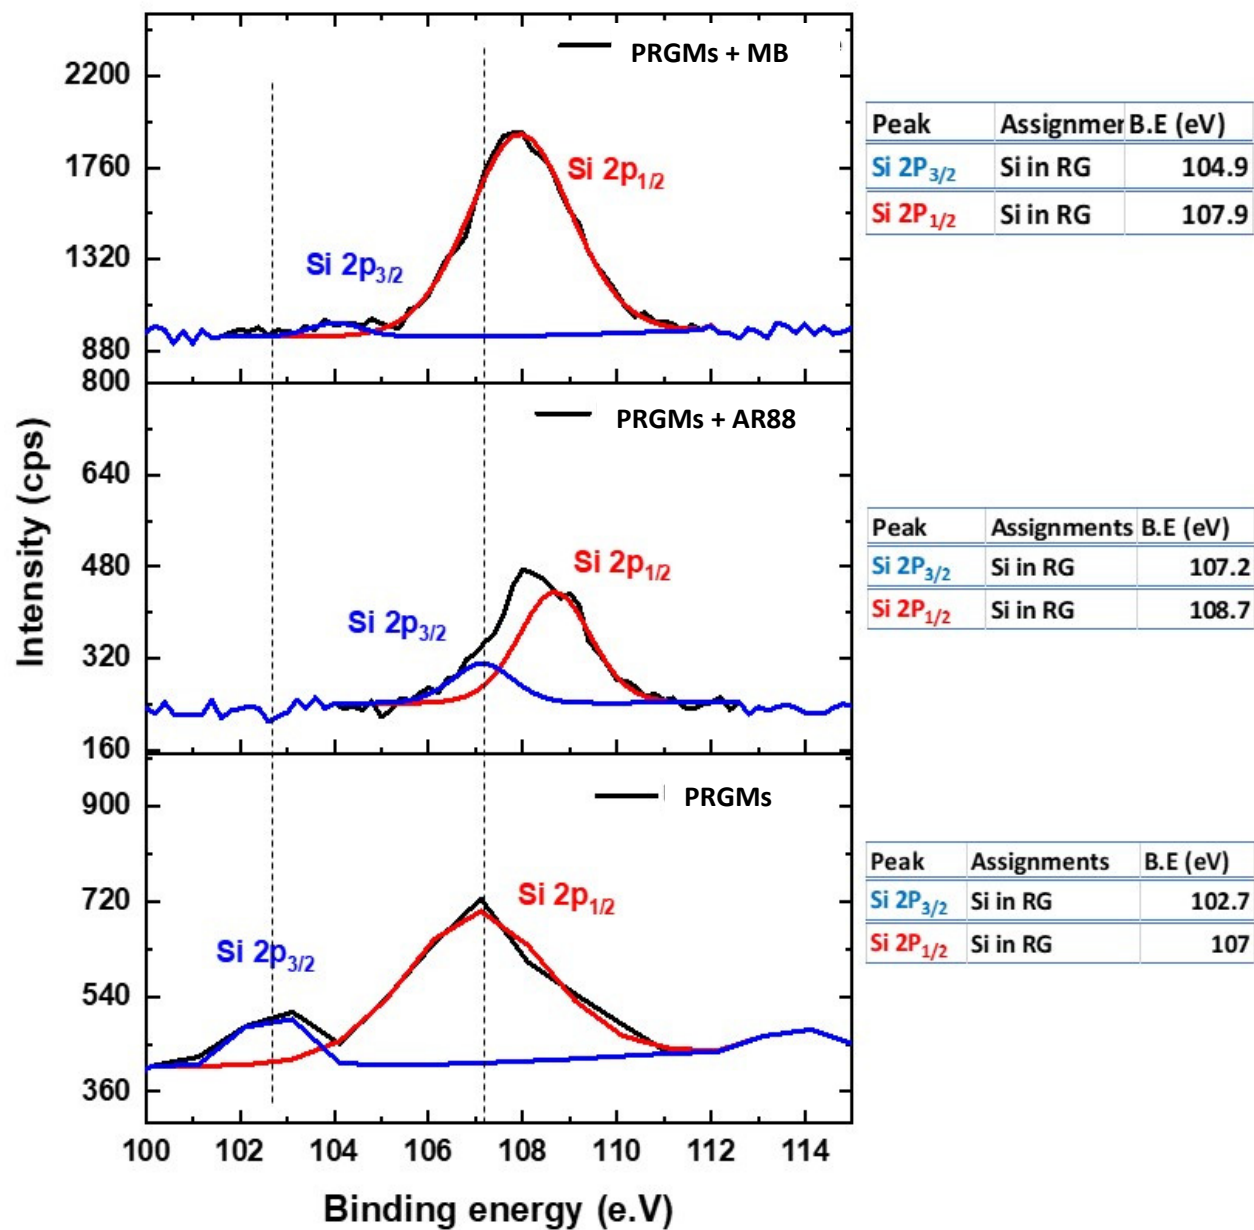

Figure S7: High resolution XPS spectra of Si 2p for PRGMs before and after AR88 and MB adsorption.
